# Supplementary material
Source: PubMed Central journal article supplement (PMC1484582)

**Supplementary Figure S3:** The phylogenetic tree used in the evolution simulations, based on a phylogenetic reconstruction of twenty RNaseA gene sequences. The three internal nodes used in Figure 2 are marked.

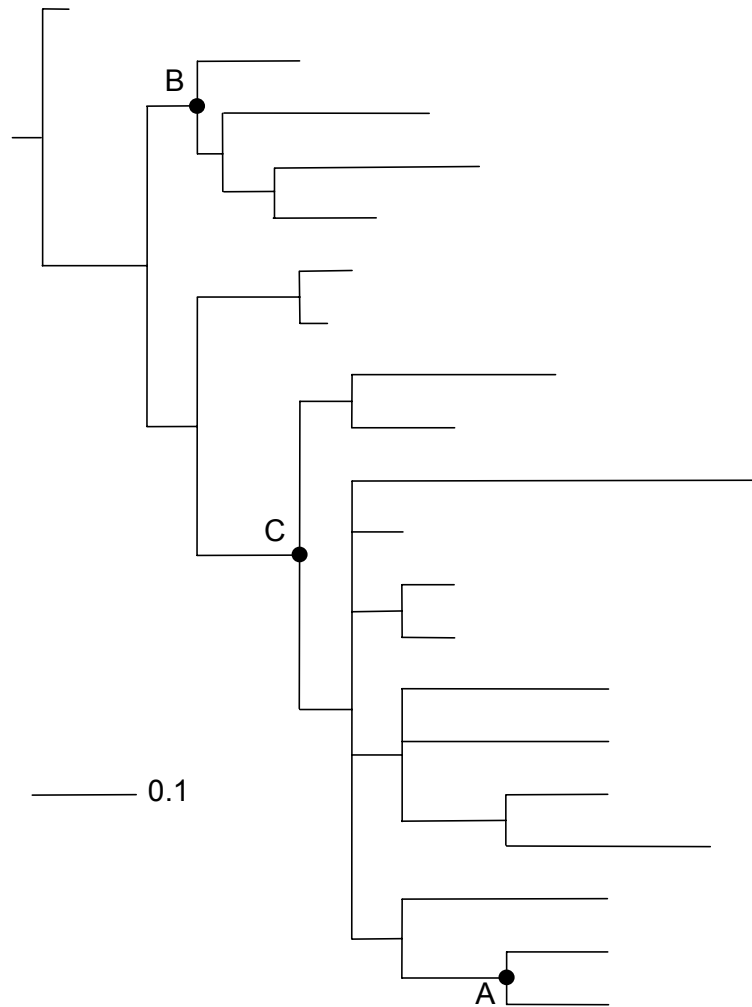

Supplement: pcbi.0020069.sg003.pdf [file pcbi.0020069.sg003.pdf]
