# Supplementary material
Source: PubMed Central journal article supplement (PMC1484582)
Supplement: pcbi.0020069.st002.pdf [file pcbi.0020069.st002.pdf]

|      |      |      |      |      |      |      |
|------|------|------|------|------|------|------|
| 12as | 16vp | 1b65 | 1b7b | 1bg2 | 1bt3 | 1bwd |
| 1by8 | 1dmh | 1dmw | 1dtd | 1eg1 | 1g9n | 1ghq |
| 1gq8 | 1gxr | 1hm4 | 1hyn | 1i9z | 1idm | 1io7 |
| 1jfp | 1lhp | 1m50 | 1mj5 | 1mkd | 1msv | 1nl4 |
| 1ofz | 1ogq | 1oqu | 1p8r | 1pa1 | 1pp9 | 1qoy |
| 1roz | 1sde | 1sid | 1sig | 1tdb | 1tux | 1uby |
| 1uf5 | 2bbv | 3por | 3pva |      |      |      |

**Supplementary Table S2:** PDB designation of structures used to form the random ensemble of states.
