# Supplementary material
Source: PubMed Central journal article supplement (PMC1484582)
Supplement: pcbi.0020069.st003.pdf [file pcbi.0020069.st003.pdf]

| <b>Species</b>                | <b>Common Name</b>     | <b>Genbank designation</b> |
|-------------------------------|------------------------|----------------------------|
| <i>Saimiri sciureus</i>       | Squirrel monkey        | AF449637                   |
| <i>Lemur catta</i>            | Andlemur               | AF449641                   |
| <i>Sus scrofa</i>             | Pig                    | AJ005521                   |
| <i>Hippopotamus amphibius</i> | Hippopotamus           | AJ005522                   |
| <i>Phocoena phocoena</i>      | Harbour porpoise       | AJ005523                   |
| <i>Pseudorca crassidens</i>   | False killer whale     | AJ005524                   |
| <i>Glis Glis</i>              | Dormouse               | AJ005767                   |
| <i>Microtus nivalis</i>       | Fieldvole              | AJ005768                   |
| <i>Camelus dromedarius</i>    | Camel                  | AJ006418                   |
| <i>Tragulus javanicus</i>     | Chevrotain             | AJ271297                   |
| <i>Atherurus macrourus</i>    | Brush-tailed porcupine | AJ535678                   |
| <i>Ctenodactylus gundi</i>    | Gundi                  | AJ535679                   |
| <i>Sciurus vulgaris</i>       | Squirrel               | AJ535680                   |
| <i>Oryctolagus cuniculus</i>  | Rabbit                 | AJ535681                   |
| <i>Artibeus jamaicensis</i>   | Fruit bat              | AJ535682                   |
| <i>Orycteropus afer</i>       | Aardvark               | AJ535683                   |
| <i>Elephas maximus</i>        | Elephant               | AJ535684                   |
| <i>Mus musculus</i>           | Mouse                  | M27814                     |
| <i>Homo sapiens</i>           | Human                  | NM_002933                  |
| <i>Bos taurus</i>             | Ox                     | X07283                     |

**Supplementary Table S3:** Ribonuclease sequences used to construct model phylogenetic tree.
